# Supplementary material for: Immunostimulating Effect of Inactivated Parapoxvirus Ovis on the Serological Response to Equine Influenza Booster Vaccination
Source: MDPI journal article supplement (doi:10.3390/vaccines10122139), 2022-12-14
Supplement: s1 [file s1]

**Table S1.** Rectal temperature (°C) and injection site effects before injection and 6 days after the first injection of iPPVO.

|                          | Horse<br>n° | Injection<br>-1D | Injection<br>D |                          | Injection<br>+1D          |         | Injection<br>+2D           |         | Injection<br>+3D |         | Injection<br>+4D |         | Injection<br>+5D |         | Injection<br>+6D |         |
|--------------------------|-------------|------------------|----------------|--------------------------|---------------------------|---------|----------------------------|---------|------------------|---------|------------------|---------|------------------|---------|------------------|---------|
|                          |             | Evening          | morning**      | Evening                  | morning                   | Evening | morning*                   | Evening | morning          | Evening | morning*         | Evening | morning          | Evening | morning          | Evening |
| <b>Control<br/>Group</b> | 1           | 37.5             | 37.5           | 37.8                     | 37.5                      | 37.8    | 37.5                       | 37.7    | 37.8             | 37.7    | 37.3             | 37.6    | 38               | 37.8    | 38               | 37.8    |
|                          | 2           | 38               | 37.6           | 38                       | 37.8                      | 38      | 37.7<br>swelling<br>< 5 cm | 37.6    | 37.9             | 38      | 37.7             | 37.9    | 38               | 38      | 37.7             | 38      |
|                          | 3           | 37.3             | 38             | 37.7                     | 38                        | 38      | 37.8                       | 37.4    | 37.9             | 37.7    | 38.1             | 37.9    | 37.7             | 37.7    | 37.6             | 37.7    |
|                          | 4           | 36.7             | 37.3           | 38                       | 37.1                      | 37.9    | 37.4                       | 37.2    | 37.4             | 37.4    | 37.3             | 37.4    | 37.4             | 37.6    | 37.3             | 37.6    |
|                          | 5           | 37.1             | 37.4           | 37.7                     | 37.6                      | 37.6    | 37.4                       | 37.2    | 37.3             | 37.2    | 37.3             | 37.5    | 37.2             | 37.4    | 37.2             | 37.6    |
|                          | 6           | 37.1             | 37.3           | 37.7                     | 37.4                      | 37.7    | 37.4                       | 37.7    | 37.7             | 37.8    | 37.7             | 37.7    | 37.7             | 37.7    | 37.4             | 37.5    |
|                          | 7           | 36.6             | 37.7           | 37.9                     | 37.7                      | 38      | 37.8                       | 37.7    | 37.2             | 37.5    | 37.4             | 37.6    | 37.3             | 37.6    | 37.7             | 37.7    |
|                          | 8           | 37.1             | 37.4           | 37.9                     | 37.8                      | 37.7    | 37.7<br>swelling<br>< 5 cm | 37.4    | 37.4             | 37.7    | 37               | 37.6    | 37.2             | 37.3    | 37.4             | 37.7    |
|                          | 9           | 37               | 37.3           | 38.1                     | 37.6                      | 37.9    | 37.5                       | 37.5    | 37.6             | 37.6    | 37.3             | 36.9    | 37.4             | 37.7    | 37.4             | 37.7    |
|                          | 10          | 37.1             | 37.4           | 38                       | 37.3                      | 37.4    | 37.9                       | 37.7    | 37.5             | 37.5    | 37.7             | 37.1    | 37.1             | 37.1    | 37.4             | 37.7    |
| <b>iPPVO<br/>group</b>   | 11          | 36.9             | 37.3           | 38                       | 36.9                      | 37.4    | 37.7                       | 37.6    | 37.7             | 37.7    | 37.5             | 37.4    | 37.7             | 37.4    | 37.8             | 37.7    |
|                          | 12          | 36.9             | 37.4           | 37.6<br>swelling<br>7 cm | 37.9<br>swelling<br>10 cm | 38      | 37.3                       | 37.7    | 37.4             | 37.8    | 37               | 36.6    | 37.7             | 37.1    | 37.2             | 36.4    |
|                          | 13          | 37.3             | 37.9           | 38.4                     | 37.9                      | 38.5    | 37.9                       | 38      | 38.2             | 37.8    | 37.5             | 37.8    | 37.8             | 38.2    | 37.8             | 38      |
|                          | 14          | 36.7             | 36.7           | 37.6                     | 37.3                      | 37.7    | 37.6                       | 36.9    | 37               | 37.5    | 37.2             | 37.8    | 37.2             | 37.5    | 37.5             | 37.5    |
|                          | 15          | 38               | 37.8           | 38.1                     | 37.3                      | 38.1    | 37.9                       | 37.8    | 37.7             | 37.8    | 37.4             | 37.7    | 37.4             | 37.9    | 37.9             | 38.2    |
|                          | 16          | 37.3             | 37.3           | 37.9                     | 37.4                      | 37.9    | 37.4                       | 37.4    | 37.5             | 37.5    | 37.4             | 37.4    | 37.7             | 37.8    | 37.5             | 37.8    |
|                          | 17          | 36.7             | 37.7           | 37.8                     | 37.8                      | 37.9    | 37.3<br>swelling<br>< 5 cm | 37      | 37.8             | 37.6    | 37.4             | 37.2    | nc               | 37.3    | 37.6             | 37.8    |
|                          | 18          | 37.3             | 37.6           | 37.6                     | 37.7                      | 38.1    | 37.4                       | 37.6    | 37.5             | 37.6    | 37.7             | 37.6    | 37.8             | 37.3    | 37.1             | 37.7    |
|                          | 19          | 37.6             | 38             | 38.4                     | 37.7                      | 38.1    | 38                         | 38      | 38               | 38.1    | 38.1             | 38      | 38               | 38.2    | 37.9             | 38      |
|                          | 20          | 37.3             | 37.4           | 38                       | 37.7                      | 37.9    | 37.3                       | 37.5    | 37.8             | 37.7    | 37.1             | 37.9    | 37.7             | 37.7    | 37.7             | 38      |

\*iPPVO injection

\*\*co-injection of iPPVO and EI vaccination
